# Supplementary material for: Females of a gift-giving spider do not trade sex for food gifts: a consequence of male deception?
Source: Springer Nature journal article supplement (doi:10.1186/s12862-017-0953-8), 2017-05-15
Supplement: 12862_2017_953_MOESM1_ESM.pdf [file 12862_2017_953_MOESM1_ESM.pdf]

## MATING EFFECTS

| Group                   | Number of experiments | Number of accepted matings | Proportion of different males | Total food occurrence |
|-------------------------|-----------------------|----------------------------|-------------------------------|-----------------------|
| Well fed-Nutritive gift | 7                     | 3                          | 1,00                          | 2,29                  |
| Well fed-Nutritive gift | 8                     | 7                          | 1,00                          | 2,88                  |
| Well fed-Nutritive gift | 9                     | 7                          | 0,86                          | 2,78                  |
| Well fed-Nutritive gift | 7                     | 2                          | 0,50                          | 2,43                  |
| Well fed-Nutritive gift | 8                     | 6                          | 0,83                          | 2,75                  |
| Well fed-Nutritive gift | 11                    | 7                          | 0,71                          | 2,55                  |
| Well fed-Nutritive gift | 10                    | 3                          | 1,00                          | 2,30                  |
| Well fed-Nutritive gift | 10                    | 3                          | 1,00                          | 2,20                  |
| Well fed-Nutritive gift | 14                    | 12                         | 0,83                          | 2,79                  |
| Well fed-Nutritive gift | 16                    | 10                         | 0,60                          | 2,75                  |
| Well fed-Nutritive gift | 11                    | 5                          | 0,80                          | 2,64                  |
| Well fed-Nutritive gift | 16                    | 3                          | 1,00                          | 2,19                  |
| Well fed-Nutritive gift | 11                    | 11                         | 0,73                          | 3,00                  |
| Well fed-Nutritive gift | 16                    | 7                          | 1,00                          | 2,44                  |
| Well fed-Nutritive gift | 10                    | 8                          | 0,75                          | 2,80                  |
| Well fed-Nutritive gift | 15                    | 8                          | 1,00                          | 2,53                  |
| Well fed-Nutritive gift | 12                    | 5                          | 1,00                          | 2,42                  |
| Well fed-Nutritive gift | 7                     | 4                          | 1,00                          | 2,57                  |
| Well fed-Nutritive gift | 9                     | 6                          | 1,00                          | 2,67                  |
| Well fed-Nutritive gift | 8                     | 7                          | 1,00                          | 2,75                  |
| Well fed-Nutritive gift | 10                    | 8                          | 1,00                          | 2,70                  |
| Well fed-Worthless gift | 9                     | 1                          | 1,00                          | 1,89                  |
| Well fed-Worthless gift | 12                    | 8                          | 1,00                          | 2,00                  |
| Well fed-Worthless gift | 10                    | 8                          | 0,88                          | 1,90                  |
| Well fed-Worthless gift | 13                    | 6                          | 1,00                          | 2,00                  |
| Well fed-Worthless gift | 13                    | 7                          | 0,71                          | 2,00                  |
| Well fed-Worthless gift | 12                    | 9                          | 0,78                          | 2,00                  |
| Well fed-Worthless gift | 27                    | 21                         | 0,38                          | 1,96                  |
| Well fed-Worthless gift | 21                    | 15                         | 0,53                          | 2,00                  |
| Well fed-Worthless gift | 26                    | 17                         | 0,41                          | 1,96                  |
| Well fed-Worthless gift | 19                    | 6                          | 1,00                          | 1,95                  |
| Well fed-Worthless gift | 11                    | 3                          | 0,67                          | 2,00                  |
| Well fed-Worthless gift | 24                    | 9                          | 0,89                          | 2,00                  |
| Well fed-Worthless gift | 16                    | 7                          | 1,00                          | 2,00                  |
| Well fed-Worthless gift | 15                    | 4                          | 1,00                          | 2,00                  |
| Well fed-Worthless gift | 19                    | 6                          | 1,00                          | 1,95                  |
| Well fed-Worthless gift | 18                    | 6                          | 1,00                          | 2,00                  |
| Well fed-Worthless gift | 13                    | 4                          | 1,00                          | 1,85                  |
| Well fed-Worthless gift | 8                     | 6                          | 1,00                          | 1,88                  |
| Well fed-Worthless gift | 10                    | 6                          | 1,00                          | 1,90                  |
| Well fed-Worthless gift | 16                    | 4                          | 1,00                          | 2,00                  |
| Well fed-Worthless gift | 9                     | 3                          | 1,00                          | 2,00                  |
| Well fed-Worthless gift | 9                     | 5                          | 1,00                          | 2,00                  |

## MATING EFFECTS

| <b>Group</b>              | <b>Number of experiments</b> | <b>Number of accepted matings</b> | <b>Proportion of different males</b> | <b>Total food occurrence</b> |
|---------------------------|------------------------------|-----------------------------------|--------------------------------------|------------------------------|
| Poorly fed-Nutritive gift | 9                            | 5                                 | 0,80                                 | 0,56                         |
| Poorly fed-Nutritive gift | 11                           | 6                                 | 1,00                                 | 0,55                         |
| Poorly fed-Nutritive gift | 12                           | 3                                 | 0,67                                 | 0,25                         |
| Poorly fed-Nutritive gift | 18                           | 7                                 | 0,86                                 | 0,39                         |
| Poorly fed-Nutritive gift | 12                           | 5                                 | 0,80                                 | 0,42                         |
| Poorly fed-Nutritive gift | 17                           | 11                                | 0,91                                 | 0,65                         |
| Poorly fed-Nutritive gift | 16                           | 10                                | 0,70                                 | 0,63                         |
| Poorly fed-Nutritive gift | 12                           | 6                                 | 0,83                                 | 0,50                         |
| Poorly fed-Nutritive gift | 16                           | 8                                 | 0,75                                 | 0,50                         |
| Poorly fed-Nutritive gift | 18                           | 11                                | 0,82                                 | 0,61                         |
| Poorly fed-Nutritive gift | 17                           | 6                                 | 1,00                                 | 0,35                         |
| Poorly fed-Nutritive gift | 15                           | 10                                | 1,00                                 | 0,67                         |
| Poorly fed-Nutritive gift | 12                           | 9                                 | 1,00                                 | 0,75                         |
| Poorly fed-Nutritive gift | 11                           | 9                                 | 1,00                                 | 0,82                         |
| Poorly fed-Nutritive gift | 13                           | 12                                | 1,00                                 | 0,92                         |
| Poorly fed-Nutritive gift | 14                           | 9                                 | 0,89                                 | 0,64                         |
| Poorly fed-Nutritive gift | 13                           | 11                                | 0,91                                 | 0,85                         |
| Poorly fed-Nutritive gift | 15                           | 8                                 | 1,00                                 | 0,53                         |
| Poorly fed-Nutritive gift | 18                           | 10                                | 0,82                                 | 0,56                         |
| Poorly fed-Nutritive gift | 11                           | 5                                 | 1,00                                 | 0,45                         |
| Poorly fed-Nutritive gift | 22                           | 16                                | 0,88                                 | 0,73                         |

**MATING EFFECTS**

| <b>Group</b>            | <b>Mating duration (min)</b> | <b>Latency of acceptance (min)</b> | <b>Cannibalism</b> | <b>Gift stealing</b> |
|-------------------------|------------------------------|------------------------------------|--------------------|----------------------|
| Well fed-Nutritive gift | 9,6                          | 23,03                              | 0                  | 2                    |
| Well fed-Nutritive gift | 16                           | 8,47                               | 0                  | 1                    |
| Well fed-Nutritive gift | 18,1                         | 9,51                               | 0                  | 0                    |
| Well fed-Nutritive gift | 2,1                          | 0,35                               | 3                  | 2                    |
| Well fed-Nutritive gift | 5,4                          | 19,58                              | 0                  | 2                    |
| Well fed-Nutritive gift | 18,8                         | 5,94                               | 1                  | 0                    |
| Well fed-Nutritive gift | 4,9                          | 6,23                               | 0                  | 2                    |
| Well fed-Nutritive gift | 1,4                          | 13,07                              | 0                  | 6                    |
| Well fed-Nutritive gift | 57,8                         | 4,63                               | 0                  | 0                    |
| Well fed-Nutritive gift | 11,9                         | 15,41                              | 0                  | 2                    |
| Well fed-Nutritive gift | 4,5                          | 3,78                               | 0                  | 3                    |
| Well fed-Nutritive gift | 8,7                          | 13,23                              | 0                  | 0                    |
| Well fed-Nutritive gift | 22,2                         | 10,98                              | 0                  | 0                    |
| Well fed-Nutritive gift | 7,3                          | 8,71                               | 2                  | 2                    |
| Well fed-Nutritive gift | 9,5                          | 16,31                              | 0                  | 1                    |
| Well fed-Nutritive gift | 2,2                          | 10,15                              | 1                  | 3                    |
| Well fed-Nutritive gift | 0,8                          | 27,26                              | 1                  | 1                    |
| Well fed-Nutritive gift | 12,7                         | 13,55                              | 0                  | 0                    |
| Well fed-Nutritive gift | 12,8                         | 8,97                               | 0                  | 0                    |
| Well fed-Nutritive gift | 6,7                          | 10,60                              | 0                  | 0                    |
| Well fed-Nutritive gift | 5,8                          | 15,96                              | 0                  | 1                    |
| Well fed-Worthless gift | 4,1                          | 6,80                               | 0                  | 0                    |
| Well fed-Worthless gift | 18,5                         | 4,45                               | 0                  | 0                    |
| Well fed-Worthless gift | 20,6                         | 10,46                              | 0                  | 0                    |
| Well fed-Worthless gift | 7                            | 15,33                              | 1                  | 0                    |
| Well fed-Worthless gift | 4                            | 5,43                               | 0                  | 0                    |
| Well fed-Worthless gift | 12,1                         | 16,50                              | 0                  | 0                    |
| Well fed-Worthless gift | 23,2                         | 6,99                               | 1                  | 0                    |
| Well fed-Worthless gift | 12,3                         | 6,55                               | 2                  | 0                    |
| Well fed-Worthless gift | 12,1                         | 5,06                               | 0                  | 4                    |
| Well fed-Worthless gift | 4,4                          | 6,22                               | 2                  | 2                    |
| Well fed-Worthless gift | 3,4                          | 5,67                               | 0                  | 0                    |
| Well fed-Worthless gift | 3,6                          | 7,93                               | 0                  | 2                    |
| Well fed-Worthless gift | 5,8                          | 1,90                               | 3                  | 1                    |
| Well fed-Worthless gift | 1,9                          | 6,98                               | 0                  | 0                    |
| Well fed-Worthless gift | 2,4                          | 12,58                              | 0                  | 2                    |
| Well fed-Worthless gift | 1,4                          | 7,50                               | 1                  | 0                    |
| Well fed-Worthless gift | 3                            | 23,00                              | 0                  | 1                    |
| Well fed-Worthless gift | 11,7                         | 3,72                               | 0                  | 0                    |
| Well fed-Worthless gift | 7,1                          | 6,25                               | 0                  | 0                    |
| Well fed-Worthless gift | 1,1                          | 3,73                               | 0                  | 1                    |
| Well fed-Worthless gift | 4,3                          | 6,70                               | 0                  | 0                    |
| Well fed-Worthless gift | 2,3                          | 8,72                               | 0                  | 0                    |

## MATING EFFECTS

| <b>Group</b>              | <b>Mating<br/>duration (min)</b> | <b>Latency of<br/>acceptance (min)</b> | <b>Cannibalism</b> | <b>Gift<br/>stealing</b> |
|---------------------------|----------------------------------|----------------------------------------|--------------------|--------------------------|
| Poorly fed-Nutritive gift | 4,3                              | 4,23                                   | 2                  | 1                        |
| Poorly fed-Nutritive gift | 10,2                             | 3,75                                   | 0                  | 2                        |
| Poorly fed-Nutritive gift | 16,8                             | 1,30                                   | 1                  | 7                        |
| Poorly fed-Nutritive gift | 9                                | 2,93                                   | 0                  | 5                        |
| Poorly fed-Nutritive gift | 7,3                              | 5,23                                   | 0                  | 4                        |
| Poorly fed-Nutritive gift | 13,6                             | 4,56                                   | 1                  | 1                        |
| Poorly fed-Nutritive gift | 15,4                             | 3,92                                   | 2                  | 4                        |
| Poorly fed-Nutritive gift | 5,8                              | 2,67                                   | 1                  | 1                        |
| Poorly fed-Nutritive gift | 17,2                             | 6,59                                   | 2                  | 1                        |
| Poorly fed-Nutritive gift | 9,8                              | 6,27                                   | 2                  | 2                        |
| Poorly fed-Nutritive gift | 4,9                              | 5,08                                   | 0                  | 5                        |
| Poorly fed-Nutritive gift | 9,6                              | 4,94                                   | 1                  | 1                        |
| Poorly fed-Nutritive gift | 15,6                             | 5,83                                   | 2                  | 0                        |
| Poorly fed-Nutritive gift | 12,2                             | 4,36                                   | 0                  | 0                        |
| Poorly fed-Nutritive gift | 31                               | 6,68                                   | 0                  | 0                        |
| Poorly fed-Nutritive gift | 12,1                             | 9,79                                   | 1                  | 0                        |
| Poorly fed-Nutritive gift | 9,7                              | 13,04                                  | 1                  | 1                        |
| Poorly fed-Nutritive gift | 9,1                              | 3,67                                   | 2                  | 1                        |
| Poorly fed-Nutritive gift | 7,3                              | 4,16                                   | 3                  | 0                        |
| Poorly fed-Nutritive gift | 3,4                              | 2,85                                   | 1                  | 1                        |
| Poorly fed-Nutritive gift | 17,8                             | 7,59                                   | 0                  | 1                        |

**FITNESS EFFECTS**

| <b>Group</b>            | <b>Latency of oviposition (days)</b> | <b>Fecundity</b> | <b>Number of spiderlings</b> | <b>Number of Unhatched eggs</b> |
|-------------------------|--------------------------------------|------------------|------------------------------|---------------------------------|
| Well fed-Nutritive gift | 13                                   | 75               | 75                           | 0                               |
| Well fed-Nutritive gift | 16                                   | 100              | 100                          | 0                               |
| Well fed-Nutritive gift | 18                                   | 52               | 39                           | 13                              |
| Well fed-Nutritive gift | 15                                   | 118              | 118                          | 0                               |
| Well fed-Nutritive gift | 14                                   |                  |                              |                                 |
| Well fed-Nutritive gift | 19                                   | 72               | 0                            | 72                              |
| Well fed-Nutritive gift | 8                                    |                  |                              |                                 |
| Well fed-Nutritive gift | 7                                    |                  |                              |                                 |
| Well fed-Nutritive gift | 27                                   | 39               |                              | 39                              |
| Well fed-Nutritive gift | 34                                   | 59               | 59                           | 0                               |
| Well fed-Nutritive gift | 24                                   | 55               | 55                           | 0                               |
| Well fed-Nutritive gift | 24                                   | 15               | 0                            | 15                              |
| Well fed-Nutritive gift | 22                                   | 65               | 65                           | 0                               |
| Well fed-Nutritive gift | 28                                   | 71               | 1                            | 70                              |
| Well fed-Nutritive gift | 18                                   | 50               | 0                            | 50                              |
| Well fed-Nutritive gift | 30                                   | 25               | 22                           | 3                               |
| Well fed-Nutritive gift | 22                                   | 52               | 50                           | 2                               |
| Well fed-Nutritive gift | 14                                   | 67               | 59                           | 8                               |
| Well fed-Nutritive gift | 18                                   | 62               | 57                           | 5                               |
| Well fed-Nutritive gift | 15                                   | 96               | 96                           | 0                               |
| Well fed-Nutritive gift | 17                                   | 78               | 78                           | 0                               |
| Well fed-Worthless gift | 11                                   | 57               | 57                           | 0                               |
| Well fed-Worthless gift | 18                                   | 35               | 35                           | 0                               |
| Well fed-Worthless gift | 17                                   |                  |                              |                                 |
| Well fed-Worthless gift | 18                                   | 55               | 55                           | 0                               |
| Well fed-Worthless gift | 26                                   |                  |                              |                                 |
| Well fed-Worthless gift | 22                                   | 8                | 0                            | 8                               |
| Well fed-Worthless gift | 53                                   |                  |                              |                                 |
| Well fed-Worthless gift | 36                                   | 25               | 25                           | 0                               |
| Well fed-Worthless gift | 51                                   | 35               | 35                           | 0                               |
| Well fed-Worthless gift | 35                                   | 64               | 62                           | 2                               |
| Well fed-Worthless gift | 14                                   | 23               | 23                           | 0                               |
| Well fed-Worthless gift | 40                                   | 19               | 19                           | 0                               |
| Well fed-Worthless gift | 28                                   | 48               | 33                           | 15                              |
| Well fed-Worthless gift | 28                                   | 21               | 0                            | 21                              |
| Well fed-Worthless gift | 35                                   | 38               | 38                           | 0                               |
| Well fed-Worthless gift | 30                                   | 30               | 0                            | 30                              |
| Well fed-Worthless gift | 20                                   | 23               | 0                            | 23                              |
| Well fed-Worthless gift | 15                                   | 79               | 79                           | 0                               |
| Well fed-Worthless gift | 19                                   | 104              | 104                          | 0                               |
| Well fed-Worthless gift | 26                                   | 37               | 12                           | 25                              |
| Well fed-Worthless gift | 16                                   | 45               | 15                           | 30                              |
| Well fed-Worthless gift | 18                                   | 10               | 8                            | 2                               |

**FITNESS EFFECTS**

| <b>Group</b>              | <b>Latency of oviposition (days)</b> | <b>Fecundity</b> | <b>Number of spiderlings</b> | <b>Number of Unhatched eggs</b> |
|---------------------------|--------------------------------------|------------------|------------------------------|---------------------------------|
| Poorly fed-Nutritive gift | 18                                   | 88               | 88                           | 0                               |
| Poorly fed-Nutritive gift | 22                                   | 38               | 38                           | 0                               |
| Poorly fed-Nutritive gift | 21                                   | 17               |                              | 17                              |
| Poorly fed-Nutritive gift | 37                                   | 20               | 0                            | 20                              |
| Poorly fed-Nutritive gift | 24                                   | 7                | 1                            | 6                               |
| Poorly fed-Nutritive gift | 30                                   |                  |                              |                                 |
| Poorly fed-Nutritive gift | 26                                   | 18               | 13                           | 5                               |
| Poorly fed-Nutritive gift | 24                                   |                  |                              |                                 |
| Poorly fed-Nutritive gift | 28                                   | 71               | 71                           | 0                               |
| Poorly fed-Nutritive gift | 36                                   | 82               | 35                           | 47                              |
| Poorly fed-Nutritive gift | 27                                   |                  |                              |                                 |
| Poorly fed-Nutritive gift | 30                                   | 49               | 48                           | 1                               |
| Poorly fed-Nutritive gift | 24                                   | 46               | 31                           | 15                              |
| Poorly fed-Nutritive gift | 22                                   | 32               | 31                           | 1                               |
| Poorly fed-Nutritive gift | 26                                   | 17               | 17                           | 0                               |
| Poorly fed-Nutritive gift | 27                                   | 51               | 51                           | 0                               |
| Poorly fed-Nutritive gift | 26                                   | 45               | 45                           | 0                               |
| Poorly fed-Nutritive gift | 30                                   | 53               | 52                           | 1                               |
| Poorly fed-Nutritive gift | 35                                   | 65               | 53                           | 12                              |
| Poorly fed-Nutritive gift | 22                                   | 34               | 34                           | 0                               |
| Poorly fed-Nutritive gift | 44                                   | 10               | 3                            | 7                               |
